# Supplementary material for: A novel fluorescence probe based on p-acid-Br and its application in thiourea detection
Source: Royal Society of Chemistry journal article supplement (doi:10.1039/c6ra06953c), 2016-01-01
Supplement: c6ra06953c1.pdf [file c6ra06953c1.pdf]

## Supporting Information

### A Novel Fluorescence Probe Based on P-acid-Br and its Application in Thiourea Detection

Xiu Wang<sup>a</sup>, Chunlei Yang<sup>a</sup>, Mei Yan<sup>\*, a</sup>, Shenguang Ge<sup>b</sup>, Jinghua Yu<sup>a</sup>

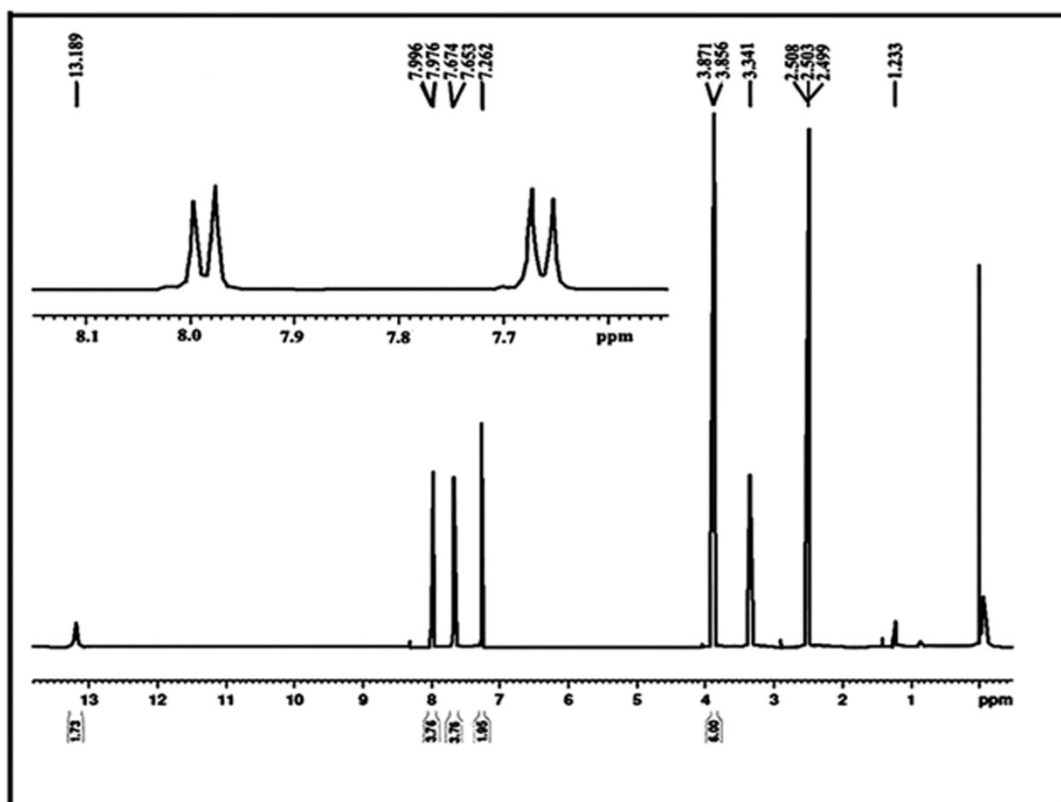

Figure SI <sup>1</sup>H NMR of p-acid.
